# Supplementary material for: Therapeutic Efficacy of Weissella cibaria CMU and CMS1 on Allergic Inflammation Exacerbated by Diesel Exhaust Particulate Matter in a Murine Asthma Model
Source: MDPI journal article supplement (doi:10.3390/medicina58091310), 2022-09-19
Supplement: s1 [file s1]

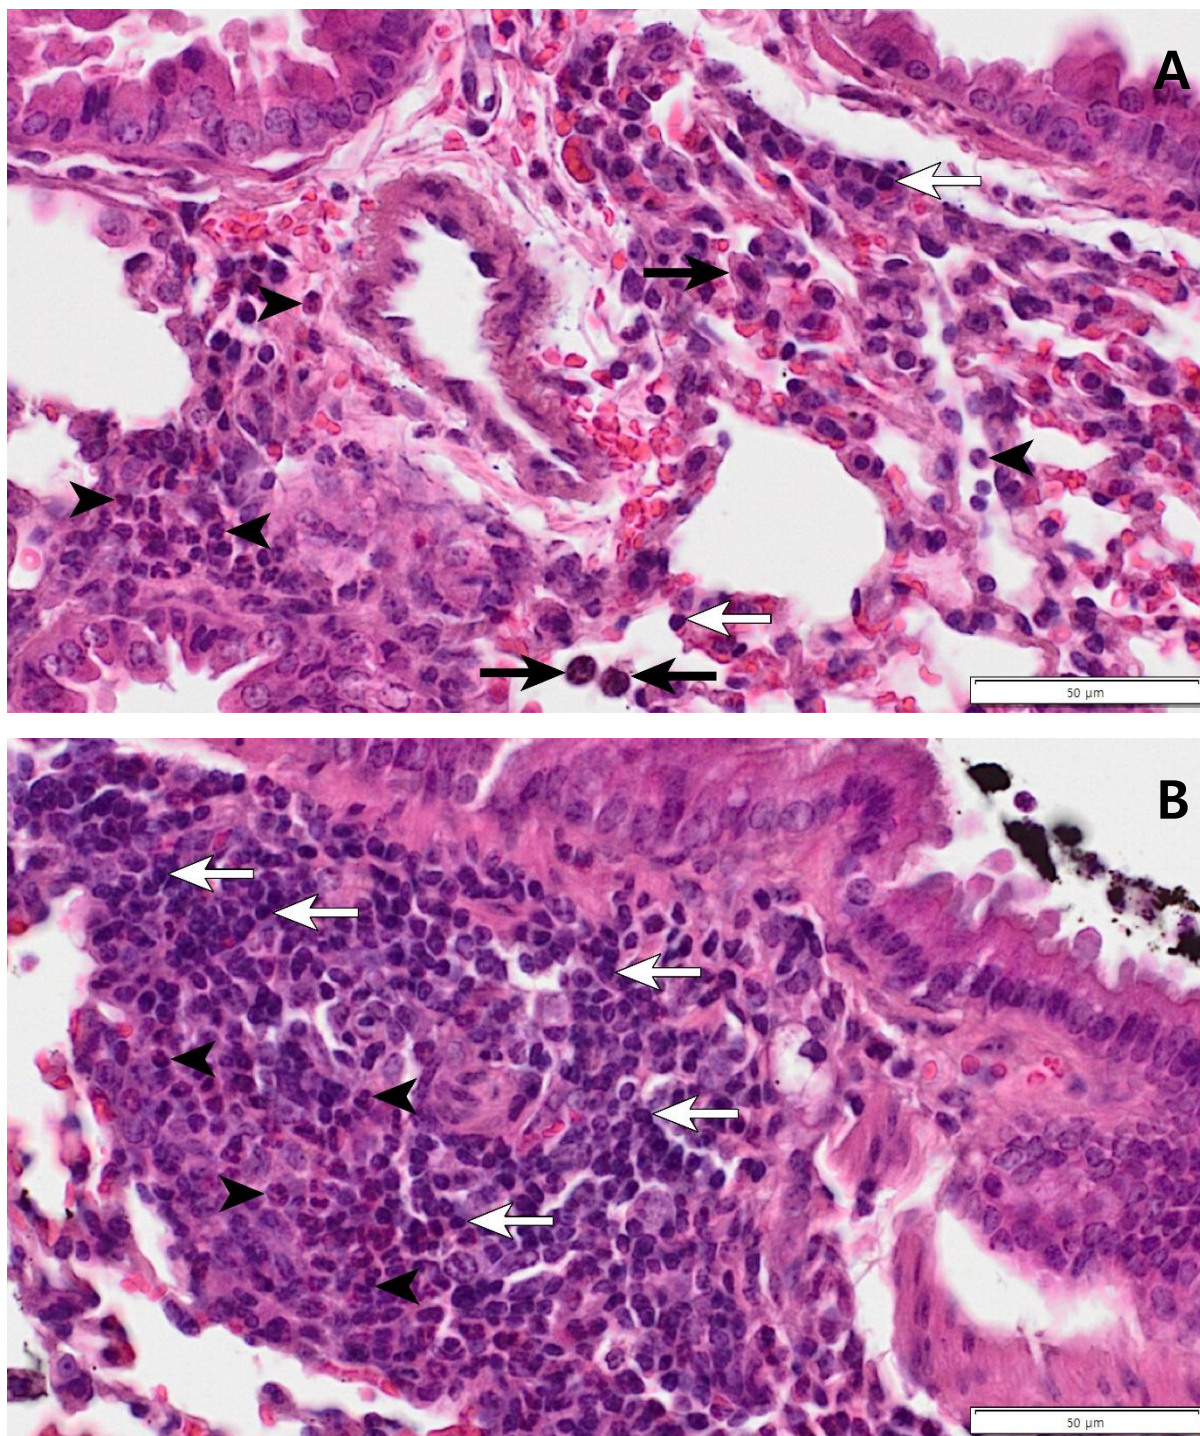

**Supplementary Figure S1.** Identification of inflammatory cells in higher magnification image of (A) CMS1-high and (B) PC group. Black arrows indicate macrophages, open arrows indicate lymphocytes, and arrow heads indicate eosinophilic infiltration. Scale bars = 50  $\mu\text{m}$ .
